# Supplementary material for: Fabrication of high power LiNi0.5Mn1.5O4battery cathodes by nanostructuring of electrode materials
Source: Royal Society of Chemistry journal article supplement (doi:10.1039/c5ra08170j), 2015-01-01
Supplement: c5ra08170j1.pdf [file c5ra08170j1.pdf]

## Fabrication of High Power $\text{LiNi}_{0.5}\text{Mn}_{1.5}\text{O}_4$ Battery Cathodes by Nanostructuring

### Supporting information

Mohammad Ali Kiani<sup>†,‡</sup>, Mohammad Safi Rahmanifar<sup>||</sup>, Maher F. El-Kady<sup>§,±</sup>, Richard B.  
Kaner<sup>§,\*</sup>, and Mir Fazlollah Mousavi<sup>†,§,\*</sup>

<sup>†</sup>: Department of Chemistry, Tarbiat Modares University, Tehran, Iran.

<sup>‡</sup>: Chemistry & Chemical Engineering Research Center of Iran

<sup>||</sup>: Faculty of basic science, Shahed University, Tehran, Iran

<sup>±</sup>: Department of Chemistry, Faculty of Science, Cairo University, Giza 12613, Egypt.

<sup>§</sup>: Department of Chemistry and Biochemistry and California NanoSystems Institute, University  
of California, Los Angeles (UCLA), Los Angeles, CA 90095, USA.

\* Address correspondence to [kaner@chem.ucla.edu](mailto:kaner@chem.ucla.edu); [mousavi@chem.ucla.edu](mailto:mousavi@chem.ucla.edu)

### Supporting Introduction:

In the  $P4_332$  phase,  $\text{Ni}^{2+}$  ions take the 4b sites and  $\text{Mn}^{4+}$  ions take the 12d sites. On the other hand, in the  $Fd3m$  phase, both  $\text{Ni}^{2+}$  and  $\text{Mn}^{4+}$  ions take the 32e sites randomly. At low

temperature an ordered structure, with the  $P4_332$  (no oxygen deficiency) space group, and at high temperature a disordered structure with the  $Fd3m$  (weak oxygen deficiency) space group is formed [1]. Several comparative studies have been carried out on these two structures [1-5]. There are conflicting reports about these structures. Some researchers have shown that the  $Fd3m$  space group showed better electrochemical behaviors [1, 3, 6-9] and others have mentioned that the  $P4_332$  structure has better electrochemical behavior as the cathode in Li batteries [2, 10-12]. The disordered LNMO has a special electrochemical behavior; the oxygen deficiency leads to the presence of manganese in the Mn(III) oxidation state, which can be oxidized to Mn(IV) at around 4 V [6], thus reducing the specific energy and inducing the distortion of the spinel structure. Furthermore, in disordered LNMO, impurities such as NiO and  $Li_xNi_yO$  are generally observed. On the other hand, disordered LNMO shows higher electronic conductivity than the ordered stoichiometric phase due to the presence of the  $Mn^{3+/4+}$  redox couple and Ni/Mn disordering. Therefore, the preparation of the high energy ordered LNMO structure that also has high specific power (high rate capability) is a big challenge in this research area.

## Supporting Scheme:

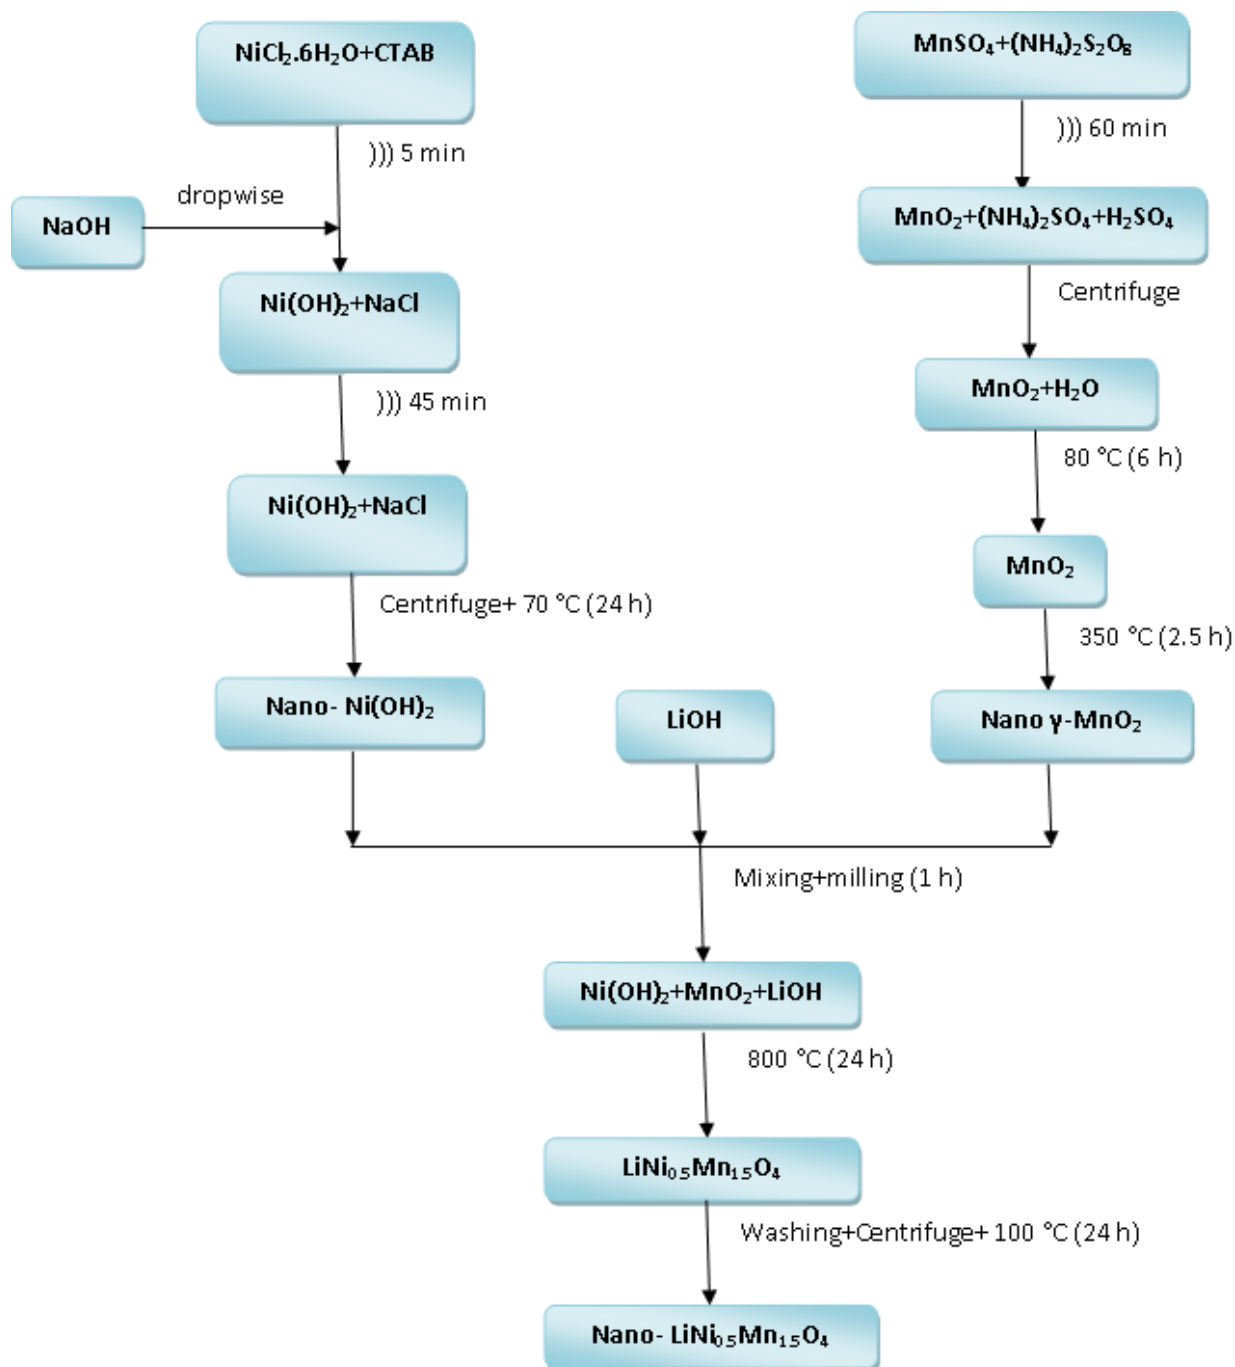

**Scheme S1.** Schematic representation of the preparation of LiNi<sub>0.5</sub>Mn<sub>1.5</sub>O<sub>4</sub>

## Supporting Table:

**Table S1.** Rct ( $\Omega\cdot\text{cm}^2$ ) Fitted Values From EIS for Nano-Particles of LNMO at Different Applied Voltages (vs Li/Li<sup>+</sup>)

| Voltage (V)                  | 4.3 | 4.4 | 4.5 | 4.6 | 4.7 | 4.8 | 4.9 | 5.0 |
|------------------------------|-----|-----|-----|-----|-----|-----|-----|-----|
| Rct ( $\Omega\text{ cm}^2$ ) | 35  | 30  | 27  | 21  | 7   | 11  | 14  | 19  |

**Table S2.** Comparison of different methods for the synthesis of LNMO as cathode materials.

|    | Synthesis method                 | Space group             | Specific capacity (mAh g <sup>-1</sup> ) | Voltage window (V) | Ref.             |
|----|----------------------------------|-------------------------|------------------------------------------|--------------------|------------------|
| 1  | Solid state reaction             | <i>P4<sub>3</sub>32</i> | 134 (20 C)                               | 3.0-5.0            | [2]              |
| 2  | Sol-gel                          | <i>P4<sub>3</sub>32</i> | 100 (0.2 mAcm <sup>-2</sup> )            | 3.6-5.0            | [17]             |
| 3  | Solid state reaction             | <i>P4<sub>3</sub>32</i> | 98 (0.2 mAcm <sup>-2</sup> )             | 3.6-5.0            | [17]             |
| 4  | Molten salt                      | <i>Fd3m</i>             | 138 (0.15 C)                             | 3.5-5.0            | [46]             |
| 5  | Molten salt                      | <i>P4<sub>3</sub>32</i> | 140 (0.15 C)                             | 3.5-5.0            | [46]             |
| 6  | Ultrasonic spray pyrolysis       | <i>Fd3m</i>             | 230 (0.1 C)                              | 2.0-5.0            | [63]             |
| 7  | Ultrasonic spray pyrolysis       | <i>P4<sub>3</sub>32</i> | 240 (0.1 C)                              | 2.0-5.0            | [63]             |
| 8  | Solid state reaction             | <i>Fd3m</i>             | 120 (0.2 C)                              | 3.5-4.9            | [64]             |
| 9  | Solid state reaction             | <i>P4<sub>3</sub>32</i> | 90 (0.2C)                                | 3.5-4.9            | [64]             |
| 10 | Resorcinol-formaldehyde assisted | <i>Fd3m</i>             | 118 (20 C)                               | 3.5-5.0            | [52]             |
| 11 | Resorcinol-formaldehyde assisted | <i>P4<sub>3</sub>32</i> | 80 (20 C)                                | 3.5-5.0            | [52]             |
| 12 | Polymer-Assisted Synthesis       | -                       | 98 (15 C)                                | 3.5-5.0            | [18]             |
| 13 | Ethylene glycol-assisted         | <i>Fd3m</i>             | 117 (5 C)                                | 3.5-4.9            | [21]             |
| 14 | Sucrose-aided combustion         | -                       | 40 (10 C)                                | 3.4-5.2            | [22]             |
| 15 | Spray drying                     | <i>P4<sub>3</sub>32</i> | 134 (0.15 C)                             | 3.0-4.9            | [41]             |
| 16 | Flame synthesis                  | <i>Fd3m</i>             | 92 (14.9 mA g <sup>-1</sup> )            | 3.5-4.9            | [47]             |
| 17 | Solid state reaction             | <i>P4<sub>3</sub>32</i> | 40 (20 C)                                | 3.5-5.0            | [65]             |
| 18 | Ultrasonic-assisted sol-gel      | <i>Fd3m</i>             | 99 (15 C)                                | 3.5-5.0            | [66]             |
| 19 | Sonochemical assisted            | <i>P4<sub>3</sub>32</i> | 100 (20 C)                               | 4.5-5.0            | <b>This Work</b> |

## References

1. J. H. Kim, S. T. Myung, C. S. Yoon, S. G. Kang and Y. K. Sun, *Chem. Mater.*, 2004, **16**, 906.
2. S. H. Park, S. W. Oh, S. H. Kang, I. Belharouak, K. Amine and Y. K. Sun, *Electrochim. Acta*, 2007, **52**, 7226.
3. L. Wang, H. Li, X. Huang and E. Baudrin, *Solid State Ionics*, 2011, **193**, 32.
4. X. Y. Feng, C. Shen, X. Fang and C. H. Chen, *J. Alloys Compd.*, 2011, **509**, 3623.
5. K. M. Shaju and P. G. Bruce, *Dalton Trans.*, 2008, 5471.
6. H. Xia, Y. S. Meng, L. Lu and G. Ceder, *J. Electrochem. Soc.*, 2007, **154**, A737.
7. T. Yang, K. Sun, Z. Lei, N. Zhang and Y. Lang, *J. Alloys Compd.*, 2010, **502**, 215.
8. M. Kunduraci, J. F. Al-Sharab and G. G. Amatucci, *Chem. Mater.*, 2006, **18**, 3585.
9. Y.-C. Jin, C.-Y. Lin and J.-G. Duh, *Electrochim. Acta*, 2012, **69**, 45.
10. X. Ma, B. Kang and G. Ceder, *J. Electrochem. Soc.*, 2010, **157**, A925.
11. S. Park and Y. Sun, *Electrochim. Acta*, 2004, **50**, 434.
12. K. Ariyoshi, Y. Iwakoshi, N. Nakayama and T. Ohzuku, *J. Electrochem. Soc.*, 2004, **151**, A296.
